# Supplementary material for: Characterising the outcomes, impacts and implementation challenges of advanced clinical practice roles in the UK: a scoping review
Source: HighWire-hosted journal article supplement (doi:10.1136/bmjopen-2020-048171), 2021-08-01
Supplement: bmjopen-2020-048171supp011_data_supplement.pdf [file bmjopen-2020-048171supp011_data_supplement.pdf]

**Supplementary File 9: Table of ACP Titles Identified in the Papers in the Review Per Profession**

| Profession    | Title(s)                                                                                                                                                                                                                                                                                                                                                                                                                                                                                                                                                                                                                                                                                                                      | No. of Titles |
|---------------|-------------------------------------------------------------------------------------------------------------------------------------------------------------------------------------------------------------------------------------------------------------------------------------------------------------------------------------------------------------------------------------------------------------------------------------------------------------------------------------------------------------------------------------------------------------------------------------------------------------------------------------------------------------------------------------------------------------------------------|---------------|
| Nursing       | <ol style="list-style-type: none"> <li>1. Advanced nurse practitioner</li> <li>2. Advanced paediatric nurse practitioner</li> <li>3. Paediatric emergency nurse practitioner</li> <li>4. Advanced community practitioner</li> <li>5. Nurse practitioner</li> <li>6. First contact nurse practitioner</li> <li>7. Consultant nurse</li> <li>8. Retrieval nurse practitioner</li> <li>9. Advanced critical care practitioner</li> <li>10. Advanced neonatal care practitioner</li> <li>11. Advanced nurse practitioner in critical care</li> <li>12. Advanced nurse practitioner in palliative care</li> <li>13. Advanced care nurse practitioner</li> <li>14. Advanced clinical practitioner</li> <li>15. Nurse-led</li> </ol> | 15            |
| Pharmacy      | <ol style="list-style-type: none"> <li>1. Independent pharmacist prescribers</li> <li>2. Independent prescribing pharmacists</li> <li>3. Pharmacist independent prescriber</li> <li>4. Clinical pharmacists</li> <li>5. Practice-based pharmacists</li> <li>6. General practice pharmacist</li> <li>7. Community pharmacist independent prescribers</li> <li>8. Pharmacist</li> <li>9. Consultant pharmacist</li> <li>10. Advanced paediatric pharmacist practitioner</li> <li>11. Specialist pharmacist independent prescriber</li> <li>12. Advance level critical care pharmacist</li> <li>13. Emergency department pharmacist practitioner</li> </ol>                                                                      | 13            |
| Radiography   | <ol style="list-style-type: none"> <li>1. Independent radiographer</li> <li>2. Radiographer</li> <li>3. Advanced uro-radiographer</li> <li>4. MRI radiographer</li> <li>5. Advanced practice radiographer</li> <li>6. Consultant radiographer</li> <li>7. Radiographer advanced practitioner</li> <li>8. Reporting radiographer</li> <li>9. Specialist radiographer</li> <li>10. Advanced practitioner radiographer</li> <li>11. Radiographer with extended role</li> <li>12. Advanced radiation therapist</li> <li>13. Image reading radiographer</li> </ol>                                                                                                                                                                 | 13            |
| Physiotherapy | <ol style="list-style-type: none"> <li>1. Advanced practitioner</li> <li>2. Advanced physiotherapy practitioner</li> <li>3. Advanced diagnostic and triage physiotherapist</li> <li>4. Advanced physiotherapist practitioner</li> <li>5. Advanced practice musculoskeletal physiotherapist practitioner</li> </ol>                                                                                                                                                                                                                                                                                                                                                                                                            | 17            |

| Profession                                                                                                                                                                                                                             | Title(s)                                                                                                                                                                                                                                                                                                                                                                                                                                                                                         | No. of Titles |
|----------------------------------------------------------------------------------------------------------------------------------------------------------------------------------------------------------------------------------------|--------------------------------------------------------------------------------------------------------------------------------------------------------------------------------------------------------------------------------------------------------------------------------------------------------------------------------------------------------------------------------------------------------------------------------------------------------------------------------------------------|---------------|
|                                                                                                                                                                                                                                        | 6. Advanced practitioner physiotherapist<br>7. Advanced practice physiotherapist<br>8. Clinical academic physiotherapist<br>9. Extended scope physiotherapist<br>10. Physiotherapist extended scope practitioner<br>11. Extended scope practitioner<br>12. First contact physiotherapist<br>13. First contact practitioner<br>14. Consultant physiotherapist independent prescriber<br>15. Consultant physiotherapist<br>16. Orthopaedic physiotherapy practitioners<br>17. Physiotherapy-led... |               |
| Occupational Therapy                                                                                                                                                                                                                   | <ul style="list-style-type: none"> <li>Occupational therapy advanced practitioner</li> <li>Extended scope practitioner</li> </ul>                                                                                                                                                                                                                                                                                                                                                                | 2             |
| Midwifery                                                                                                                                                                                                                              | <ul style="list-style-type: none"> <li>Consultant midwife</li> </ul>                                                                                                                                                                                                                                                                                                                                                                                                                             | 1             |
| Healthcare Scientist                                                                                                                                                                                                                   | <ul style="list-style-type: none"> <li>Advanced practitioner healthcare scientist</li> </ul>                                                                                                                                                                                                                                                                                                                                                                                                     | 1             |
| Paramedic                                                                                                                                                                                                                              | <ul style="list-style-type: none"> <li>Advanced paramedic practitioner</li> </ul>                                                                                                                                                                                                                                                                                                                                                                                                                | 1             |
| Perioperative Specialist Practitioner                                                                                                                                                                                                  | <ul style="list-style-type: none"> <li>Perioperative specialist practitioner</li> </ul>                                                                                                                                                                                                                                                                                                                                                                                                          | 1             |
| Audiology                                                                                                                                                                                                                              | <ul style="list-style-type: none"> <li>Audiologist</li> </ul>                                                                                                                                                                                                                                                                                                                                                                                                                                    | 1             |
| Multi-Professional<br>(papers including a varied mix of professions including health visiting, midwifery, nursing, physiotherapy, pharmacy, paramedics, dietician, speech & language therapy, unspecified allied health professionals) |                                                                                                                                                                                                                                                                                                                                                                                                                                                                                                  |               |
